# Supplementary material
Source: PubMed Central journal article supplement (PMC5222690)
Supplement: NIHMS836068-supplement-3.pdf [file NIHMS836068-supplement-3.pdf]

**Supplementary Table 1:** Taqman Primer-probe set name and ID used for real-time PCR analysis.

| Primer-Probe   | Identification Number |
|----------------|-----------------------|
| ICAM-1         | Mm00516023_m1         |
| VCAM-1         | Mm01320970_m1         |
| E-Selectin     | Mm00441278_m1         |
| MAdCAM-1       | Mm00522088_m1         |
| PTGS2          | Mm00478374_m1         |
| CXCL2          | Mm00436450_m1         |
| 18S            | Hs99999901_s1         |
| $\beta$ -actin | Hs01060665_g1         |
| GPR4           | Mm00558777_s1         |
